# Supplementary material for: Lettuce be happy: A longitudinal UK study on the relationship between fruit and vegetable consumption and well-being
Source: PubMed Central journal article supplement (PMC6381324; doi:10.1016/j.socscimed.2018.12.017), 2019-02
Supplement: mmc1.pdf [file mmc1.pdf]

## Online appendix for 'Lettuce be happy: A longitudinal UK study on the relationship between fruit and vegetable consumption and well-being'

**Table A1: Additional pooled OLS regression estimates showing the cross-sectional relationship between fruit & vegetable consumption and demographic characteristics**

| Dependent variable: number of fruit and vegetable portions consumed (on a day where at least one portion consumed) |                            |                           |
|--------------------------------------------------------------------------------------------------------------------|----------------------------|---------------------------|
|                                                                                                                    | (1)                        | (2)                       |
| Age                                                                                                                | 0.0331***<br>(0.00165)     | 0.0164***<br>(0.00201)    |
| Age <sup>2</sup>                                                                                                   | -0.000223***<br>(1.61e-05) | -4.12e-05**<br>(2.09e-05) |
| Male                                                                                                               | -0.341***<br>(0.0102)      | -0.278***<br>(0.0111)     |
| Income (prev month)                                                                                                | 5.09e-05***<br>(1.88e-06)  | 1.83e-05***<br>(2.06e-06) |
| <b>Other controls</b>                                                                                              |                            |                           |
| Married                                                                                                            | 0.145***<br>(0.0161)       | 0.115***<br>(0.0171)      |
| Divorced                                                                                                           | -0.0229<br>(0.0233)        | -0.00947<br>(0.0249)      |
| Widowed                                                                                                            | -0.143***<br>(0.0277)      | -0.143***<br>(0.0313)     |
| Number of children                                                                                                 | -0.0573***<br>(0.00576)    | -0.00163<br>(0.00616)     |
| Education dummies                                                                                                  | No                         | Yes                       |
| Employment dummies                                                                                                 | No                         | Yes                       |
| Dairy and bread consumption dummies                                                                                | No                         | Yes                       |
| Lifestyle and health dummies                                                                                       | No                         | Yes                       |
| Wave dummy                                                                                                         | 0.128***<br>(0.0101)       | 0.0757***<br>(0.0107)     |
| Constant                                                                                                           | 2.167***<br>(0.0354)       | 1.703***<br>(0.0531)      |
| Observations                                                                                                       | 90360                      | 74177                     |
| R <sup>2</sup>                                                                                                     | 0.049                      | 0.134                     |

Standard errors in parentheses. \*\*\*  $p < 0.01$ , \*\*  $p < 0.05$ , \*  $p < 0.1$

Notes: These are pooled OLS regressions designed to test the relationship between demographic variables such as age, income, and sex, and the quantity of fruit and vegetable portions consumed on a typical day where at least one portion is consumed. Age appears to have a hump-shaped relationship with fruit and vegetable consumption, even after controlling for income. (1) only includes a short set of socio-demographic variables. (2) adds additional variables for education, employment, lifestyle, dairy consumption, and bread consumption, as in specification 3 of our main table.

**Table A2: Pooled OLS regressions showing the cross-sectional relationship between daily fruit and vegetable consumption, and well-being**

|                                                                                            | Dependent Variable:    |                           |                        |                           |
|--------------------------------------------------------------------------------------------|------------------------|---------------------------|------------------------|---------------------------|
|                                                                                            | <i>Reversed GHQ-12</i> | <i>Reversed GHQ-12</i>    | Life satis             | Life satis                |
| Portions of fruit and veg per day (on a typical day when at least one portion is consumed) | 0.255***<br>(0.0127)   | 0.252***<br>(0.0130)      | 0.0897***<br>(0.00342) | 0.0747***<br>(0.00350)    |
| <b>Demographics</b>                                                                        |                        |                           |                        |                           |
| Age                                                                                        |                        | -0.205***<br>(0.00699)    |                        | -0.0704***<br>(0.00188)   |
| Age^2                                                                                      |                        | 0.00229***<br>(7.12e-05)  |                        | 0.000759***<br>(1.92e-05) |
| Male                                                                                       |                        | 0.979***<br>(0.0405)      |                        | -0.0044<br>(0.0109)       |
| Income (prev month)                                                                        |                        | 7.24e-05***<br>(7.59e-06) |                        | 3.35e-05***<br>(2.04e-06) |
| Married                                                                                    |                        | 0.196***<br>(0.0632)      |                        | 0.264***<br>(0.0170)      |
| Divorced                                                                                   |                        | -0.928***<br>(0.0907)     |                        | -0.188***<br>(0.0244)     |
| Widowed                                                                                    |                        | -0.452***<br>(0.110)      |                        | -0.0252<br>(0.0296)       |
| Number of children                                                                         |                        | 0.0408*<br>(0.0228)       |                        | -0.00616<br>(0.00615)     |
| <b>Education (reference category is no qualification)</b>                                  |                        |                           |                        |                           |
| Degree                                                                                     |                        | 0.685***<br>(0.0751)      |                        | 0.228***<br>(0.0202)      |
| Other higher degree                                                                        |                        | 0.626***<br>(0.0816)      |                        | 0.169***<br>(0.0220)      |
| A-Level etc                                                                                |                        | 0.474***<br>(0.0742)      |                        | 0.115***<br>(0.0200)      |
| GCSE etc                                                                                   |                        | 0.565***<br>(0.0726)      |                        | 0.0981***<br>(0.0196)     |
| Other qualification                                                                        |                        | 0.331***<br>(0.0830)      |                        | 0.00548<br>(0.0224)       |
| <b>Employment Status (reference category is self-employed)</b>                             |                        |                           |                        |                           |
| Employed                                                                                   |                        | -0.113<br>(0.0767)        |                        | 0.0197<br>(0.0206)        |
| Unemployed                                                                                 |                        | -2.580***<br>(0.115)      |                        | -0.597***<br>(0.0310)     |
| Inactive                                                                                   |                        | -1.605***<br>(0.0843)     |                        | -0.142***<br>(0.0227)     |
| Wave dummy                                                                                 |                        | -0.103***<br>(0.0391)     |                        | -0.193***<br>(0.0105)     |
| Constant                                                                                   | 23.98***<br>(0.0466)   | 27.42***<br>(0.186)       | 4.851***<br>(0.0126)   | 6.054***<br>(0.0500)      |
| Observations                                                                               | 79608                  | 77913                     | 79610                  | 77910                     |
| R <sup>2</sup>                                                                             | 0.005                  | 0.05                      | 0.009                  | 0.058                     |

Standard errors in parentheses. \*\*\*  $p < 0.01$ , \*\*  $p < 0.05$ , \*  $p < 0.1$

Notes: The four regressions in this table are pooled OLS regressions that measure the cross-sectional relationship between the number of fruit and vegetable portions consumed (on a day where at least one portion is consumed), and well-being. The first two regressions use *reversed GHQ-12* as a measure of mental well-being. The third and fourth regressions use *life satisfaction* (measured on a 1-7 scale) as a measure of subjective well-being. All regressions show a positive relationship.
